# Supplementary material
Source: MDPI journal article supplement (https://www.mdpi.com/2071-1050/8/3/274)
Supplement: s1 [file s1]

Archive with 7 entries (6 files):
- SupplementaryInformationA151230.pdf
- SupplementaryMaterialB151231.pdf
- SupplementaryMaterialC160228.pdf
- sustainability-114983-supplementary/
- sustainability-114983-supplementary/Supplementary Material A.pdf
- sustainability-114983-supplementary/Supplementary Material B.pdf
- sustainability-114983-supplementary/Supplementary Material C.pdf
