# Supplementary material
Source: MDPI journal article supplement (https://www.mdpi.com/2071-1050/8/3/274)
Supplement: s1 [file s1 › SupplementaryMaterialC160228.pdf]

# Supplementary Material C

## for the article

### Using the Sustainability Monitoring and Assessment Routine (SMART) for Systematic Analysis of the Trade-offs and Synergies between Sustainability Dimensions and Themes at Farm Level

Christian Schader<sup>1,\*</sup>, Lukas Baumgart<sup>1</sup>, Jan Landert<sup>1</sup>, Adrian Muller<sup>1,2</sup>,  
Brian Ssebunya<sup>1</sup>, Johan Blockeel<sup>1</sup>, Rainer Weissshaidinger<sup>3</sup>, Richard  
Petrasek<sup>3</sup>, Dóra Mészáros<sup>4</sup>, Susanne Padel<sup>5</sup>, Catherine Gerrard<sup>5</sup>, Lawrence  
Smith<sup>5</sup>, Urs Niggli<sup>1</sup> and Matthias Stolze<sup>1</sup>

<sup>1</sup> Research Institute of Organic Agriculture (FiBL), Frick, Switzerland;  
[christian.schader@fibl.org](mailto:christian.schader@fibl.org)

<sup>2</sup> ETH Zürich, Switzerland; [amueller@env.ethz.ch](mailto:amueller@env.ethz.ch)

<sup>3</sup> Research Institute of Organic Agriculture (FiBL), Vienna, Austria;  
[rainer.weissshaidinger@fibl.org](mailto:rainer.weissshaidinger@fibl.org)

<sup>4</sup> Szent István University, Hungary ([meszaros.dora@mkk.szie.hu](mailto:meszaros.dora@mkk.szie.hu));

<sup>5</sup> Organic Research Centre, Elm Farm (ORC), Newbury, United Kingdom,  
[susanne.p@organicresearchcentre.com](mailto:susanne.p@organicresearchcentre.com)

\* Correspondence: [christian.schader@fibl.org](mailto:christian.schader@fibl.org); Tel.: +41-62-865-0416



### Table S61. Overview of trade-offs at sub-theme level

[illegible]

Green colour indicates strong, yellow medium and red colour weak synergies.
